# Supplementary material for: High Users of Emergency Departments in Quebec Among Patients With Both Schizophrenia and a Substance Use Disorder
Source: Atypon-hosted journal article supplement (doi:10.1176/appi.ps.201300474), 2014-08-15
Supplement: appi.ps.201300474.ds001.pdf [file appi.ps.201300474.ds001.pdf]

## Descriptive statistics of ED visits in 2006/2007 (N=2, 921)

| Basic statistics |      | statistics of visits                |                             |                             |                                   |
|------------------|------|-------------------------------------|-----------------------------|-----------------------------|-----------------------------------|
| Mean             | SD   | 100 <sup>th</sup> percentile (Max.) | 95 <sup>th</sup> percentile | 50 <sup>th</sup> percentile | 1 <sup>st</sup> percentile (Min.) |
| 1.99             | 1.45 | 22 visits                           | 5 visits                    | 2 visits                    | 1 visit                           |

## Prevalence of high use of emergency department over time (N=2, 921)

| Period     | 2001/2002   | 2002/2003     | 2003/2004    | 2004/2005    | 2005/2006   | 2006/2007     |
|------------|-------------|---------------|--------------|--------------|-------------|---------------|
| Prevalence | 0.06        | 0.054         | 0.054        | 0.050        | 0.056       | 0.053         |
| 95 % CI    | 0.05 – 0.06 | 0.046 – 0.062 | 0.046 – 0.06 | 0.042 – 0.06 | 0.04 – 0.06 | 0.044 – 0.061 |

## Determinants of high ED use in 2006/2007 (N=2, 921)

| Category                                                                           | Factors                                                                                 | Crude OR    | 95 % CI     | p       | Adjusted OR | 95 % CI     |
|------------------------------------------------------------------------------------|-----------------------------------------------------------------------------------------|-------------|-------------|---------|-------------|-------------|
| <b>Predisposing factors</b>                                                        | <b>Age in years</b>                                                                     | .99         | .98 – 1.00  | ns      | .98         | .97 – 1.00  |
|                                                                                    | <b>Sex</b>                                                                              |             |             | ns      |             |             |
|                                                                                    | <i>Men (Reference: Women)</i>                                                           | .76         | .55 – 1.06  |         | .92         | .64 – 1.32  |
| <b>Enabling factors</b>                                                            | <b>Place of residence</b>                                                               |             |             | ns      |             |             |
|                                                                                    | <i>Urban (reference: Rural)</i>                                                         | .76         | .51 – 1.14  |         | .82         | .52 – 1.30  |
|                                                                                    | <b>Type of medical region</b> (Reference: Far or isolated)                              |             |             | ns      |             |             |
|                                                                                    | <i>University</i>                                                                       | .71         | .41 – 1.25  |         | 1.0         | .52 – 1.89  |
|                                                                                    | <i>Peripheral</i>                                                                       | 1.23        | .70 – 2.18  |         | 1.60        | .85 – 3.01  |
|                                                                                    | <i>Intermediate</i>                                                                     | 1.08        | .59 – 1.96  |         | 1.26        | .66 – 2.41  |
|                                                                                    | <b>Type of user over time</b> (Reference: Consistently high users)                      |             |             | ns      |             |             |
|                                                                                    | <i>Inconsistent users</i>                                                               | .69         | .14 – 3.36  |         | 2.02        | .29 – 14.10 |
|                                                                                    | <i>Consistently low users</i>                                                           | .28         | 0.06 – 1.29 |         | 2.24        | .33 – 15.42 |
|                                                                                    | <b>Number of days of hospitalization for any reason during the preceding five years</b> | 1.00        | 1.00 – 1.01 | < .0001 | 1.00        | .99 – 1.00  |
| <b>Frequency of hospitalization for any reason during the preceding five years</b> | 1.12                                                                                    | 1.10 – 1.15 | < .0001     | 1.10    | 1.06 – 1.14 |             |
| <b>Number of psychiatric comorbidities</b>                                         | 1.71                                                                                    | 1.45 – 2.03 | < .0001     | 1.38    | 1.55 – 1.65 |             |
| <b>Number of physical comorbidities</b>                                            | 1.21                                                                                    | 1.11 – 1.31 | < .0001     | 1.15    | 1.03 – 1.29 |             |
| <b>Use of typical antipsychotics</b>                                               |                                                                                         |             | ns          |         |             |             |
| <i>Yes (Reference: No)</i>                                                         | 1.21                                                                                    | .83 – 1.78  |             | .93     | .61 – 1.41  |             |
| <b>Use of atypical antipsychotics</b>                                              |                                                                                         |             | .002        | 1.43    | .87 – 2.35  |             |
| <i>Yes (Reference: No)</i>                                                         | 2.03                                                                                    | 1.28 – 3.22 |             |         |             |             |
| <b>Use of antidepressants</b>                                                      |                                                                                         |             | .004        |         |             |             |
| <i>Yes (Reference: No)</i>                                                         | 1.73                                                                                    | 1.23 – 2.45 |             | 1.31    | .88 – 1.95  |             |
| <b>Use of anxiolytics</b>                                                          |                                                                                         |             | ns          |         |             |             |
| <i>Yes (Reference: No)</i>                                                         | 1.31                                                                                    | .94 – 1.83  |             | .94     | .64 – 1.39  |             |
| <b>Use of methadone</b>                                                            |                                                                                         |             | ns          |         |             |             |
| <i>Yes (Reference: No)</i>                                                         | 1.61                                                                                    | .98 – 2.65  |             | .91     | .51 – 1.63  |             |
